# Supplementary material for: Remote controlled optical manipulation of bimetallic nanoparticle catalysts using peptides
Source: Royal Society of Chemistry journal article supplement (doi:10.1039/d1cy00189b), 2021-01-01
Supplement: d1cy00189b1.pdf [file d1cy00189b1.pdf]

## Supporting Information

### Remote Controlled Optical Manipulation of Bimetallic Nanoparticle Catalysts using Peptides

Randy L. Lawrence,<sup>a,‡</sup> Mary O. Olagunju,<sup>a,‡</sup> Yang Liu,<sup>b</sup> Krishnamurthy Mahalingam,<sup>c</sup> Joseph M. Slocik,<sup>c</sup> Rajesh R. Naik,<sup>c</sup> Anatoly I. Frenkel,<sup>b,d\*</sup> Marc R. Knecht,<sup>a,e,\*</sup>

<sup>a</sup> Department of Chemistry, University of Miami, 1301 Memorial Drive, Coral Gables, Florida 33146, USA.

<sup>b</sup> Department of Materials Science and Chemical Engineering, Stony Brook University, Stony Brook, New York 11794, USA.

<sup>c</sup> Air Force Research Laboratory, Wright-Patterson Air Force Base, Ohio 45433, USA.

<sup>d</sup> Chemistry Division, Brookhaven National Laboratory, Upton, New York 11973, USA.

<sup>e</sup> Dr. J.T. Macdonald Foundation Biomedical Nanotechnology Institute, university of Miami, UM Life Science Technology Building, 1951 NW 7th Ave, Suite 475, Miami, Florida 33136, USA.

<sup>‡</sup>These authors contributed equally.

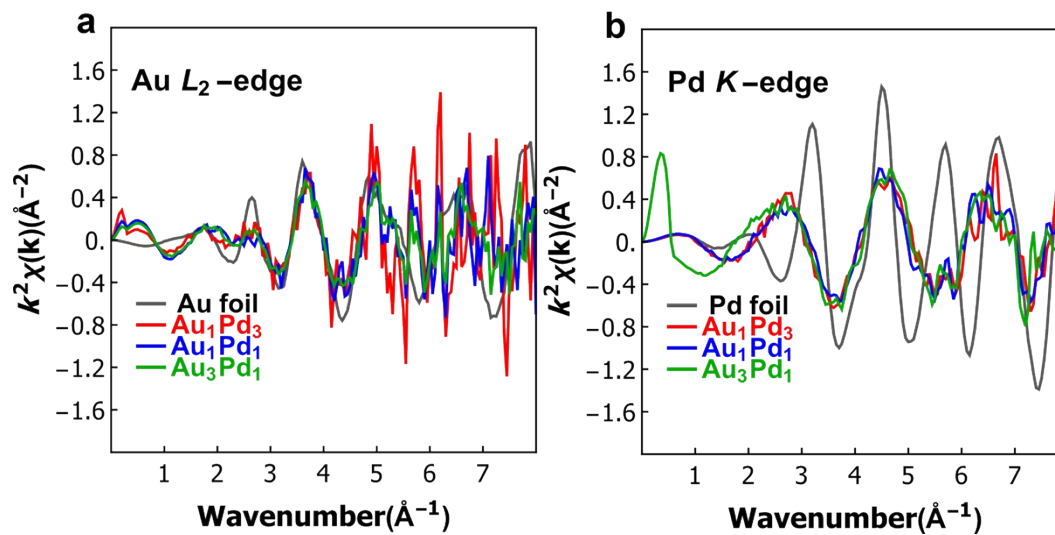

**Figure S1.**  $k^2$ -weighted EXAFS data for the PdAu bimetallic materials at (a) the Au  $L_2$ -edge and (b) the Pd  $K$ -edge. Au and Pd foils were measured as references.

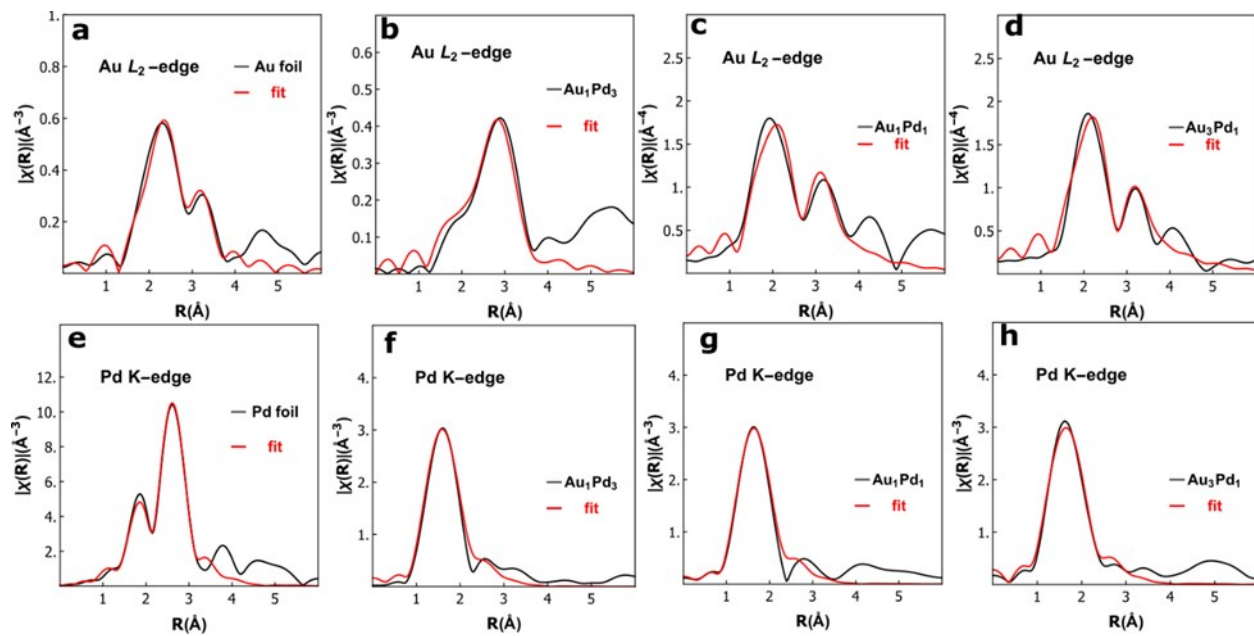

**Figure S2.** EXAFS data and fits for the Au  $L_2$ -edge for (a) Au foil, (b)  $Au_1Pd_3$ , (c)  $Au_1Pd_1$ , and (d)  $Au_3Pd_1$ , and the Pd K-edge for (e) Pd foil, (f)  $Au_1Pd_3$ , (g)  $Au_1Pd_1$ , and (h)  $Au_3Pd_1$ .

| <b>Sample</b>                       | <b><i>k</i> range (Au L<sub>2</sub>-edge)</b> | <b><i>r</i> range (Au L<sub>2</sub>-edge)</b> | <b><i>k</i> range (Pd K-edge)</b>          | <b><i>r</i> range (Pd K-edge)</b> |
|-------------------------------------|-----------------------------------------------|-----------------------------------------------|--------------------------------------------|-----------------------------------|
| <b>Au foil</b>                      | 2.0 Å <sup>-1</sup> to 7.0 Å <sup>-1</sup>    | 1.55 Å to 3.8 Å                               | --                                         | --                                |
| <b>Pd foil</b>                      | --                                            | --                                            | 2.0 Å <sup>-1</sup> to 8.5 Å <sup>-1</sup> | 1.0 Å to 3.1 Å                    |
| <b>Au<sub>1</sub>Pd<sub>3</sub></b> | 1.5 Å <sup>-1</sup> to 7.0 Å <sup>-1</sup>    | 1.85 Å to 3.6 Å                               | 1.5 Å <sup>-1</sup> to 7.0 Å <sup>-1</sup> | 1.0 Å to 2.3 Å                    |
| <b>Au<sub>1</sub>Pd<sub>1</sub></b> | 1.0 Å <sup>-1</sup> to 7.0 Å <sup>-1</sup>    | 1.85 Å to 3.7 Å                               | 1.5 Å <sup>-1</sup> to 7.0 Å <sup>-1</sup> | 1.0 Å to 2.4 Å                    |
| <b>Au<sub>3</sub>Pd<sub>1</sub></b> | 1.0 Å <sup>-1</sup> to 7.0 Å <sup>-1</sup>    | 1.85 Å to 3.7 Å                               | 1.5 Å <sup>-1</sup> to 7.0 Å <sup>-1</sup> | 1.0 Å to 2.4 Å                    |

**Table S1.** Fitting *k* range and *r* range of the PdAu NPs.

| Pd:Au |              | Rate constant ( $10^{-3} \text{ s}^{-1}$ ) |             |            |            |            | Activation Energy (kJ/mol) | Frequency Factor ( $\text{s}^{-1}$ ) |
|-------|--------------|--------------------------------------------|-------------|------------|------------|------------|----------------------------|--------------------------------------|
|       |              | 15°C                                       | 20°C        | 25°C       | 30°C       | 35°C       |                            |                                      |
| 3:1   | <i>trans</i> | 21.4 ± 7.1                                 | 27.1 ± 1.5  | 31.8 ± 1.2 | 38.7 ± 0.5 | 48.4 ± 9.2 | 29.2 ± 5.1                 | 4.3 × 10 <sup>3</sup>                |
|       | <i>cis</i>   | 24.4 ± 3.3                                 | 33.2 ± 1.4  | 43.7 ± 2.6 | 51.8 ± 6.0 | 66.9 ± 1.6 | 36.3 ± 2.8                 | 9.7 × 10 <sup>4</sup>                |
| 1:1   | <i>trans</i> | 20.5 ± 2.1                                 | 32.1 ± 1.0  | 56.2 ± 6.6 | 54.0 ± 1.2 | 41.3 ± 5.5 | N/A                        | N/A                                  |
|       | <i>cis</i>   | 29.3 ± 3.1                                 | 32.0 ± 0.4  | 36.3 ± 4.0 | 39.7 ± 3.6 | 46.6 ± 3.5 | 16.8 ± 2.9                 | 3.3 × 10 <sup>1</sup>                |
| 1:3   | <i>trans</i> | 28.6 ± 1.5                                 | 38.7 ± 0.01 | 50.3 ± 0.1 | 62.7 ± 0.1 | 72.5 ± 0.3 | 34.7 ± 1.8                 | 5.8 × 10 <sup>4</sup>                |
|       | <i>cis</i>   | 43.3 ± 2.5                                 | 53.8 ± 2.0  | 68.3 ± 2.4 | 74.6 ± 2.4 | 85.2 ± 2.0 | 24.9 ± 2.1                 | 1.5 × 10 <sup>3</sup>                |

**Table S2.** Summary of experimental values for bimetallic PdAu NP catalysis.

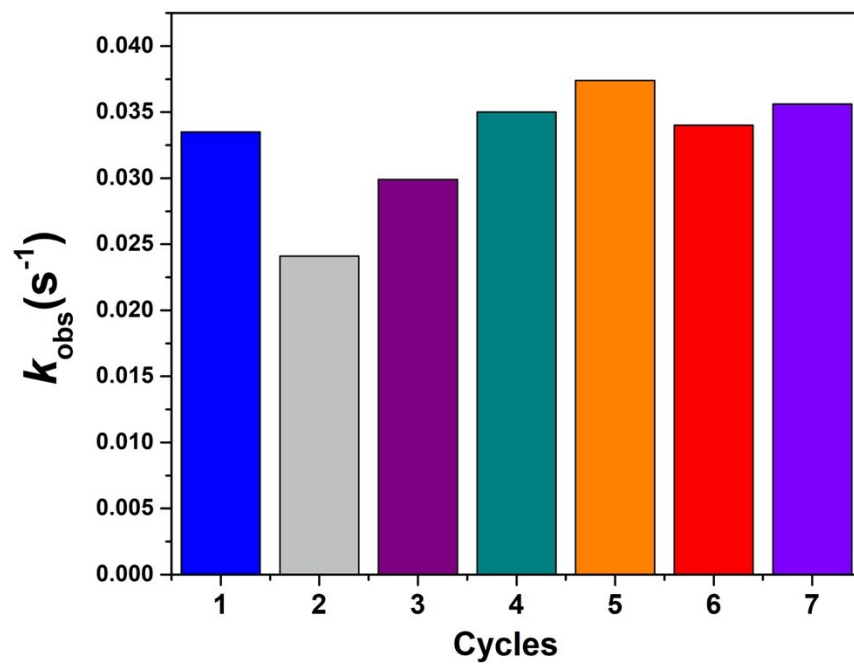

**Figure S3.** Catalytic recyclability analysis using the bimetallic NPs prepared at a Pd:Au ratio of 1:3 at  $\sim 20^{\circ}\text{C}$ .
